# Supplementary material for: Metabolomic analysis identifies differentially produced oral metabolites, including the oncometabolite 2-hydroxyglutarate, in patients with head and neck squamous cell carcinoma
Source: PubMed Central journal article supplement — BBA Clin. 2016 Dec 18;7:8–15. doi: 10.1016/j.bbacli.2016.12.001 (PMC5199158; doi:10.1016/j.bbacli.2016.12.001), 2016-12-18
Supplement: mmc4.pdf [file mmc4.pdf]

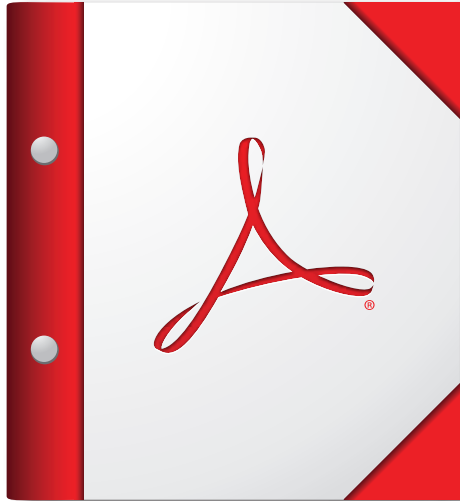

**For the best experience, open this PDF portfolio in  
Acrobat 9 or Adobe Reader 9, or later.**

[Get Adobe Reader Now!](#)
